# Supplementary material for: Summertime fine particulate nitrate pollution in the North China Plain: Increasingtrends, formation mechanisms, and implications for control policy
Source: Copernicus journal article supplement (doi:10.5194/acp-2018-89), 2018-02-08
Supplement: Supplementary file 1 [file acp-2018-89-supplement.pdf]

**Supplementary materials of**

**Summertime fine particulate nitrate pollution in the North China Plain: Increasing trends, formation mechanisms, and implications for control policy**

Liang Wen<sup>1</sup>, Likun Xue<sup>1\*</sup>, Xinfeng Wang<sup>1</sup>, Caihong Xu<sup>1</sup>, Tianshu Chen<sup>1</sup>, Lingxiao Yang<sup>1</sup>, Tao Wang<sup>2</sup>, Wenxing Wang<sup>1</sup>

<sup>1</sup> Environment Research Institute, Shandong University, Ji'nan, Shandong, China

<sup>2</sup> Department of Civil and Environmental Engineering, Hong Kong Polytechnic University, Hong Kong, China,

\*Corresponding author: L. K. Xue, [xuelikun@sdu.edu.cn](mailto:xuelikun@sdu.edu.cn)

Page 1      Cover page

Page 2      *Table S1*

Page 3      *Table S2*

Page 4      *Table S3 and S4*

**Table S1. The chemical reactions related to nitrate formation in the RACM/CAPRAM.**

| No. | Categorized pathways                                  | Reactions                                                                                                                                                    |
|-----|-------------------------------------------------------|--------------------------------------------------------------------------------------------------------------------------------------------------------------|
| 1   | HNO <sub>3</sub> partitioning                         | HNO <sub>3</sub> = H <sup>+</sup> + NO <sub>3</sub> <sup>-</sup>                                                                                             |
| 2   |                                                       | N <sub>2</sub> O <sub>5</sub> + H <sub>2</sub> O = 2H <sup>+</sup> + 2NO <sub>3</sub> <sup>-</sup>                                                           |
| 3   | N <sub>2</sub> O <sub>5</sub> hydrolysis              | N <sub>2</sub> O <sub>5</sub> = NO <sub>2</sub> <sup>+</sup> + NO <sub>3</sub> <sup>-</sup>                                                                  |
| 4   |                                                       | NO <sub>2</sub> <sup>+</sup> + H <sub>2</sub> O = NO <sub>3</sub> <sup>-</sup> + 2H <sup>+</sup>                                                             |
| 5   |                                                       | NO <sub>3</sub> · + OH <sup>-</sup> = NO <sub>3</sub> <sup>-</sup> + OH ·                                                                                    |
| 6   |                                                       | NO <sub>3</sub> · + Fe <sup>2+</sup> = NO <sub>3</sub> <sup>-</sup> + Fe <sup>3+</sup>                                                                       |
| 7   |                                                       | NO <sub>3</sub> · + Mn <sup>2+</sup> = NO <sub>3</sub> <sup>-</sup> + Mn <sup>3+</sup>                                                                       |
| 8   |                                                       | NO <sub>3</sub> · + H <sub>2</sub> O <sub>2</sub> = NO <sub>3</sub> <sup>-</sup> + H <sup>+</sup> + HO <sub>2</sub> ·                                        |
| 9   |                                                       | NO <sub>3</sub> · + CH <sub>3</sub> O <sub>2</sub> H = NO <sub>3</sub> <sup>-</sup> + H <sup>+</sup> + CH <sub>3</sub> O <sub>2</sub> ·                      |
| 10  |                                                       | NO <sub>3</sub> · + HO <sub>2</sub> · = NO <sub>3</sub> <sup>-</sup> + H <sup>+</sup> + O <sub>2</sub> ·                                                     |
| 11  |                                                       | NO <sub>3</sub> · + O <sub>2</sub> <sup>-</sup> = NO <sub>3</sub> <sup>-</sup> + O <sub>2</sub> ·                                                            |
| 12  |                                                       | NO <sub>3</sub> · + HSO <sub>3</sub> <sup>-</sup> = NO <sub>3</sub> <sup>-</sup> + H <sup>+</sup> + SO <sub>3</sub> <sup>-</sup>                             |
| 13  |                                                       | NO <sub>3</sub> · + SO <sub>3</sub> <sup>2-</sup> = NO <sub>3</sub> <sup>-</sup> + SO <sub>3</sub> <sup>-</sup>                                              |
| 14  |                                                       | NO <sub>3</sub> · + HSO <sub>4</sub> <sup>-</sup> = NO <sub>3</sub> <sup>-</sup> + H <sup>+</sup> + SO <sub>4</sub> <sup>-</sup>                             |
| 15  |                                                       | NO <sub>3</sub> · + SO <sub>4</sub> <sup>2-</sup> = NO <sub>3</sub> <sup>-</sup> + SO <sub>4</sub> <sup>-</sup>                                              |
| 16  |                                                       | NO <sub>2</sub> <sup>-</sup> + NO <sub>3</sub> · = NO <sub>3</sub> <sup>-</sup> + NO <sub>2</sub> ·                                                          |
| 17  |                                                       | OHCH <sub>2</sub> SO <sub>3</sub> <sup>-</sup> + NO <sub>3</sub> · = NO <sub>3</sub> <sup>-</sup> + OHCH <sub>2</sub> SO <sub>3</sub> ·                      |
| 18  | NO <sub>3</sub> radical<br>aqueous-phase<br>reactions | CH <sub>3</sub> OH + NO <sub>3</sub> · = NO <sub>3</sub> <sup>-</sup> + H <sup>+</sup> + CH <sub>2</sub> OH ·                                                |
| 19  |                                                       | CH <sub>3</sub> CH <sub>2</sub> OH + NO <sub>3</sub> · = NO <sub>3</sub> <sup>-</sup> + H <sup>+</sup> + CH <sub>3</sub> CHOH ·                              |
| 20  |                                                       | CH <sub>2</sub> (OH) <sub>2</sub> + NO <sub>3</sub> · = NO <sub>3</sub> <sup>-</sup> + H <sup>+</sup> + CH(OH) <sub>2</sub> ·                                |
| 21  |                                                       | CH <sub>3</sub> CH(OH) <sub>2</sub> + NO <sub>3</sub> · = NO <sub>3</sub> <sup>-</sup> + H <sup>+</sup> + CH <sub>3</sub> C(OH) <sub>2</sub> ·               |
| 22  |                                                       | CH <sub>3</sub> CHO + NO <sub>3</sub> · = NO <sub>3</sub> <sup>-</sup> + H <sup>+</sup> + CH <sub>3</sub> CO ·                                               |
| 23  |                                                       | HCOOH + NO <sub>3</sub> · = NO <sub>3</sub> <sup>-</sup> + H <sup>+</sup> + CO <sub>2</sub> H ·                                                              |
| 24  |                                                       | HCOO <sup>-</sup> + NO <sub>3</sub> · = NO <sub>3</sub> <sup>-</sup> + CO <sub>2</sub> H ·                                                                   |
| 25  |                                                       | CH <sub>3</sub> COOH + NO <sub>3</sub> · = NO <sub>3</sub> <sup>-</sup> + H <sup>+</sup> + CH <sub>2</sub> COOH ·                                            |
| 26  |                                                       | CH <sub>3</sub> COO <sup>-</sup> + NO <sub>3</sub> · = NO <sub>3</sub> <sup>-</sup> + CH <sub>3</sub> · + CO <sub>2</sub>                                    |
| 27  |                                                       | NO <sub>3</sub> · + HC <sub>2</sub> O <sub>4</sub> <sup>-</sup> = NO <sub>3</sub> <sup>-</sup> + H <sup>+</sup> + C <sub>2</sub> O <sub>4</sub> <sup>-</sup> |
| 28  |                                                       | NO <sub>3</sub> · + C <sub>2</sub> O <sub>4</sub> <sup>2-</sup> = NO <sub>3</sub> <sup>-</sup> + C <sub>2</sub> O <sub>4</sub> <sup>-</sup>                  |
| 29  |                                                       | NO <sub>3</sub> · + CH(OH) <sub>2</sub> CH(OH) <sub>2</sub> = H <sup>+</sup> + NO <sub>3</sub> <sup>-</sup> + CH(OH) <sub>2</sub> C(OH) <sub>2</sub> ·       |
| 30  |                                                       | NO <sub>3</sub> · + CH(OH) <sub>2</sub> COOH = H <sup>+</sup> + NO <sub>3</sub> <sup>-</sup> + C(OH) <sub>2</sub> COOH ·                                     |
| 31  |                                                       | NO <sub>3</sub> · + Br <sup>-</sup> = NO <sub>3</sub> <sup>-</sup> + Br ·                                                                                    |
| 32  |                                                       | CO <sub>3</sub> <sup>2-</sup> + NO <sub>3</sub> · = NO <sub>3</sub> <sup>-</sup> + CO <sub>3</sub> <sup>-</sup>                                              |
| 33  |                                                       | HCO <sub>3</sub> <sup>-</sup> + NO <sub>3</sub> · = NO <sub>3</sub> <sup>-</sup> + CO <sub>3</sub> <sup>-</sup> + H <sup>+</sup>                             |
| 34  |                                                       | NO <sub>3</sub> · + Cl <sup>-</sup> = NO <sub>3</sub> <sup>-</sup> + Cl ·                                                                                    |

**Table S2. Summary of the selected nitrate formation cases for the modeling analyses.**

|                                                          | Site    | Period                                                   | Obs. $\Delta\text{NO}_3^-$ ( $\mu\text{g m}^{-3}$ ) | Ave. $\text{NO}_2$ (ppb) | Ave. $\text{O}_3$ (ppb) | Ave. $\text{NH}_3$ (ppb) |
|----------------------------------------------------------|---------|----------------------------------------------------------|-----------------------------------------------------|--------------------------|-------------------------|--------------------------|
| Daytime                                                  | Ji'nan  | 8:00 – 16:00 16 <sup>th</sup> May 2014                   | 13.1                                                | 19.5                     | 38                      | 14.5                     |
|                                                          |         | 16:00 – 19:00 5 <sup>th</sup> Sept. 2015                 | 5.9                                                 | 12.0                     | 80                      | 11.0                     |
|                                                          |         | 11:00 – 15:00 10 <sup>th</sup> Sept. 2015                | 5.4                                                 | 12.0                     | 76                      | 24.4                     |
|                                                          | Yucheng | 9:00 – 14:00 25 <sup>th</sup> Jun. 2014                  | 8.0                                                 | 23.0                     | 32                      | 12.7                     |
|                                                          |         | 6:00 – 12:00 5 <sup>th</sup> Jul. 2014                   | 21.9                                                | 24.1                     | 6                       | 54.4                     |
|                                                          |         | 16:00 – 20:00 15 <sup>th</sup> Jul. 2014                 | 16.1                                                | 9.0                      | 74                      | 23.0                     |
|                                                          | Mt. Tai | 11:00 – 16:00 31 <sup>st</sup> Jul. 2014                 | 11.5                                                | 3.1                      | 84                      | 38.9                     |
|                                                          |         | 8:00 – 17:00 15 <sup>th</sup> Aug. 2014                  | 9.5                                                 | 2.0                      | 77                      | 29.4                     |
|                                                          |         | 15:00 – 20:00 19 <sup>th</sup> Aug. 2014                 | 13.4                                                | 10.6                     | 88                      | 21.5                     |
|                                                          |         | 8:00 – 15:00 21 <sup>st</sup> Aug. 2014                  | 5.8                                                 | 3.2                      | 92                      | 24.2                     |
| Nighttime                                                | Ji'nan  | 19:00 11 <sup>st</sup> – 0:00 12 <sup>nd</sup> May 2014  | 10.6                                                | 14.2                     | 13                      | 24.7                     |
|                                                          |         | 19:00 16 <sup>th</sup> – 3:00 17 <sup>th</sup> May 2014  | 23.8                                                | 22.8                     | 35                      | 33.1                     |
|                                                          |         | 20:00 9 <sup>th</sup> – 1:00 10 <sup>st</sup> Sept. 2015 | 10.9                                                | 17.8                     | 21                      | 23.2                     |
|                                                          | Yucheng | 3:00 – 9:00 8 <sup>th</sup> Jun. 2014                    | 10.1                                                | 39.7                     | 19                      | 30.2                     |
|                                                          |         | 23:00 26 <sup>th</sup> – 8:00 27 <sup>th</sup> Jun. 2014 | 17.1                                                | 14.3                     | 18                      | 18.0                     |
|                                                          |         | 20:00 8 <sup>th</sup> – 8:00 9 <sup>th</sup> Jul. 2014   | 33.8                                                | 25.6                     | 13                      | 56.3                     |
|                                                          |         | 21:00 12 <sup>nd</sup> – 8:00 13 <sup>rd</sup> Jul. 2014 | 21.6                                                | 15.7                     | 20                      | 32.1                     |
|                                                          |         | 21:00 13 <sup>rd</sup> – 5:00 14 <sup>th</sup> Jul. 2014 | 32.7                                                | 35.0                     | 24                      | 51.9                     |
|                                                          | Mt. Tai | 19:00 – 23:00 28 <sup>st</sup> Jul. 2014                 | 11.9                                                | 7.1                      | 81                      | 45.1                     |
|                                                          |         | 21:00 25 <sup>th</sup> – 3:00 26 <sup>th</sup> Aug. 2014 | 10.5                                                | 2.3                      | 86                      | 24.4                     |
| 20:00 26 <sup>th</sup> – 0:00 27 <sup>th</sup> Aug. 2014 |         | 7.4                                                      | 5.7                                                 | 96                       | 21.1                    |                          |

**Table S3. Initial setup of daytime model experiment for nitrate formation**

| Species                      | Initial values         |
|------------------------------|------------------------|
| SO <sub>2</sub>              | 10 ppbv                |
| O <sub>3</sub>               | 60 ppbv                |
| NO <sub>2</sub>              | 0-200 ppbv             |
| NH <sub>3</sub>              | 0-40 ppbv              |
| NO <sub>3</sub> <sup>-</sup> | 0 μg m <sup>-3</sup>   |
| Temperature                  | 25 °C                  |
| RH                           | 80%                    |
| Liquid water content         | 2 μmol m <sup>-3</sup> |
| Average particle radius      | 100 nm                 |

**Table S4. Initial setup of nighttime model experiment for nitrate formation**

| Species                      | Initial values         |
|------------------------------|------------------------|
| SO <sub>2</sub>              | 10 ppbv                |
| NH <sub>3</sub>              | 10 ppbv                |
| NO <sub>2</sub>              | 0-80 ppbv              |
| O <sub>3</sub>               | 0-80 ppbv              |
| NO <sub>3</sub> <sup>-</sup> | 0 μg m <sup>-3</sup>   |
| Temperature                  | 25 °C                  |
| RH                           | 80%                    |
| Liquid water content         | 2 μmol m <sup>-3</sup> |
| Average particle radius      | 100 nm                 |
